# Supplementary material for: Modelling the Role of UCH-L1 on Protein Aggregation in Age-Related Neurodegeneration
Source: PLoS One. 2010 Oct 6;5(10):e13175. doi: 10.1371/journal.pone.0013175 (PMC2950841; doi:10.1371/journal.pone.0013175)
Supplement: Table S8 — List of parameters which have an effect on inclusion formation. (0.03 MB DOC) [file pone.0013175.s010.doc]

**Table S8 Sensitivity Analysis**

| **Parameters which have large positive effect on inclusion formation** | **Parameters which have large negative effect on inclusion formation** | **Parameters which have small positive effect on inclusion formation** | **Parameters which have small negative effect on inclusion formation** |
| --- | --- | --- | --- |
| *ksynNatP* | *kbinProt* | *kbinSUBUchl1* | *kactDUB* |
| *kgrowth1* | *kremROS* | *ksynUchl1* | *kdegLysUchl1* |
| *kgenROS* | *kactProt* | *ksynasyn* | *kCMAasyn* |
| *kdamUchl1* | *kbinLamp2aUchl1dam* | *kgrowth2* | *kubss* |
| *ksynSUB* |  | *kbinMisPDUB* | *kubs* |
| *krelLamp2aUchl1dam* |  | *kmisfoldSUB* | *krefoldSUB* |
| *kagg1dam* |  | *krelUbUchl1* | *kbinUbUchl1* |
|  |  | *kmisfold* | *kbinasynProt* |
|  |  | *kubd* | *krefold* |
|  |  |  | *kbinUchl1Prot* |
